## **Correction: Is the Current Management of Severe Sepsis and Septic Shock Really Evidence Based?**

Jean-Louis Vincent

doi:10.1371/journal.pmed.0030346

In *PLoS Medicine*, volume 3, issue 9:

The competing interests statement was incomplete and should have read: "Jean-Louis Vincent is the current chairman of the International Sepsis Forum, and a member of the steering committee of the Surviving Sepsis Campaign. His personal views do not necessarily reflect those of the other members of these committees. The Surviving Sepsis Campaign has received funding from Eli Lilly, Baxter, and Edwards. The International Sepsis Forum is currently sponsored by bioMérieux, Biosite, Brahms Diagnostics, EBI, Eli Lilly Corporation, Eisai Global Clinical Development, GlaxoSmithKline, Novo Nordisk, Roche Diagnostics, Spectral Diagnostics, Takeda, and Toray. The author declares that he has received grants and/or honorariums from AstraZeneca, Baxter, bioMérieux, Biosite, Brahms Diagnostics, Edwards LifeSciences, Eli Lilly Corporation, Eisai Global Clinical Development, GlaxoSmithKline, Novo Nordisk, Spectral Diagnostics, Takeda, Toray, and Wyeth."

This correction note may be found online at doi:10.1371/journal.pmed.0030543

Published: December 26, 2006.

Citation: (2006) Correction: Is the current management of severe sepsis and septic shock really evidence based? *PLoS Med* 3(12): e543. doi:10.1371/journal.pmed.0030543

## **Correction: Lack of Mucosal Immune Reconstitution during Prolonged Treatment of Acute and Early HIV-1 Infection**

Saurabh Mehandru, Michael A. Poles, Klara Tenner-Racz, Patrick Jean-Pierre, Victoria Manuelli, Peter Lopez, Anita Shet, Andrea Low, Hiroshi Mohri, Daniel Boden, Paul Racz, Martin Markowitz

doi:10.1371/journal.pmed.0030484

In *PLoS Medicine*, volume 03, issue 12:

A related publication should have been cited as a reference in this paper:

Mehandru S, Poles MA, Tenner-Racz K, Manuelli V, Jean-Pierre P, et al. (2006) Mechanisms of gastrointestinal CD4+ T cell depletion during acute and early HIV-1 infection. *J Virol*. E-pub 25 October 2006

This correction note may be found online at doi:10.1371/journal.pmed.0030546

Published December 26, 2006.

Citation: (2006) Correction: Lack of mucosal immune reconstitution during prolonged treatment of acute and early HIV-1 infection. *PLoS Med* 3(12): e546. doi:10.1371/journal.pmed.0030546
